# Supplementary material for: Synthesis and optical properties of the first lead borate bromide with isolated BO3groups: Pb2Ba3(BO3)3Br
Source: Royal Society of Chemistry journal article supplement (doi:10.1039/c5dt02652k), 2015-01-01

## Supporting Information

### Synthesis and optical properties of the first lead borate bromide with isolated $\text{BO}_3$ groups: $\text{Pb}_2\text{Ba}_3(\text{BO}_3)_3\text{Br}$

Qun Jing<sup>1,2</sup>, Xiaoyu Dong<sup>1,3</sup>, Zihua Yang<sup>1\*</sup>, Shilie Pan<sup>1\*</sup>

<sup>1</sup> Key Laboratory of Functional Materials and Devices for Special Environments of CAS, Xinjiang Technical Institute of Physics & Chemistry of CAS, Xinjiang Key Laboratory of Electronic Information Materials and Devices, 40-1 South Beijing Road, Urumqi 830011, China

<sup>2</sup> Department of Physics, School of Science, Shihezi University, Shihezi 832000, China

<sup>3</sup> Engineering Department of Chemistry and Environment, Xinjiang Institute of Engineering; 236 Nanchang Road, Urumqi 830091, China;

\*To whom correspondence should be addressed

E-mail: zhyang@ms.xjb.ac.cn (Zihua Yang) Tel: (86)-991-3810816. Fax: (86)991-3838957.

E-mail: slpan@ms.xjb.ac.cn (Shilie Pan) Tel: (86)-991-3674558. Fax: (86)991-3838957

**Table S1.** Bond lengths [Å] and angles [deg.] for Pb<sub>2</sub>Ba<sub>3</sub>(BO<sub>3</sub>)<sub>3</sub>Br.

|               |            |
|---------------|------------|
| Pb(1)-O(5)    | 2.319(8)   |
| Pb(1)-O(1)    | 2.360(8)   |
| Pb(1)-O(4)    | 2.474(7)   |
| Pb(1)-Br(1)   | 3.1720(7)  |
| Ba(1)-O(3)    | 2.608(11)  |
| Ba(1)-O(5)#3  | 2.796(9)   |
| Ba(1)-O(5)#4  | 2.796(9)   |
| Ba(1)-O(2)#5  | 2.836(8)   |
| Ba(1)-O(2)#6  | 2.836(8)   |
| Ba(1)-O(4)#3  | 2.947(7)   |
| Ba(1)-O(4)#4  | 2.947(7)   |
| Ba(1)-Br(1)#2 | 3.4412(11) |
| Ba(1)-Br(1)#7 | 3.4412(11) |
| Ba(2)-O(1)#3  | 2.666(9)   |
| Ba(2)-O(1)    | 2.666(9)   |
| Ba(2)-O(2)#8  | 2.812(9)   |
| Ba(2)-O(2)#6  | 2.812(9)   |
| Ba(2)-O(3)    | 2.9243(8)  |
| Ba(2)-O(3)#2  | 2.9243(8)  |
| Ba(2)-O(4)    | 2.929(8)   |
| Ba(2)-O(4)#3  | 2.929(8)   |
| Ba(3)-O(2)    | 2.737(9)   |
| Ba(3)-O(2)#8  | 2.737(9)   |
| Ba(3)-O(1)#9  | 2.804(9)   |
| Ba(3)-O(1)#3  | 2.804(9)   |
| Ba(3)-O(3)#2  | 2.9460(9)  |
| Ba(3)-O(3)#9  | 2.9460(9)  |
| Ba(3)-O(4)#5  | 3.047(7)   |
| Ba(3)-O(4)#2  | 3.047(7)   |
| Ba(3)-O(5)#10 | 3.190(9)   |
| Ba(3)-O(5)#11 | 3.190(9)   |
| B(1)-O(4)#12  | 1.390(11)  |
| B(1)-O(4)     | 1.390(11)  |

|                     |           |
|---------------------|-----------|
| B(1)-O(3)           | 1.40(2)   |
| B(2)-O(2)#8         | 1.367(15) |
| B(2)-O(5)           | 1.370(15) |
| B(2)-O(1)#11        | 1.387(15) |
| O(5)-Pb(1)-O(1)     | 99.3(3)   |
| O(5)-Pb(1)-O(4)     | 89.5(3)   |
| O(1)-Pb(1)-O(4)     | 76.6(3)   |
| O(3)-Ba(1)-O(5)#3   | 112.9(2)  |
| O(3)-Ba(1)-O(5)#4   | 112.9(2)  |
| O(5)#3-Ba(1)-O(5)#4 | 134.3(4)  |
| O(3)-Ba(1)-O(2)#5   | 70.94(16) |
| O(5)#3-Ba(1)-O(2)#5 | 154.1(3)  |
| O(5)#4-Ba(1)-O(2)#5 | 49.8(2)   |
| O(3)-Ba(1)-O(2)#6   | 70.94(16) |
| O(5)#3-Ba(1)-O(2)#6 | 49.8(2)   |
| O(5)#4-Ba(1)-O(2)#6 | 154.1(3)  |
| O(2)#5-Ba(1)-O(2)#6 | 141.9(3)  |
| O(3)-Ba(1)-O(4)#3   | 74.42(15) |
| O(5)#3-Ba(1)-O(4)#3 | 71.9(2)   |
| O(5)#4-Ba(1)-O(4)#3 | 121.3(2)  |
| O(2)#5-Ba(1)-O(4)#3 | 85.3(2)   |
| O(2)#6-Ba(1)-O(4)#3 | 84.6(3)   |
| O(3)-Ba(1)-O(4)#4   | 74.42(15) |
| O(5)#3-Ba(1)-O(4)#4 | 121.3(2)  |
| O(5)#4-Ba(1)-O(4)#4 | 71.9(2)   |
| O(2)#5-Ba(1)-O(4)#4 | 84.6(3)   |
| O(2)#6-Ba(1)-O(4)#4 | 85.3(2)   |
| O(4)#3-Ba(1)-O(4)#4 | 148.8(3)  |
| O(1)#3-Ba(2)-O(1)   | 148.0(3)  |
| O(1)#3-Ba(2)-O(2)#8 | 79.5(2)   |
| O(1)-Ba(2)-O(2)#8   | 94.0(2)   |
| O(1)#3-Ba(2)-O(2)#6 | 94.0(2)   |
| O(1)-Ba(2)-O(2)#6   | 79.5(2)   |
| O(2)#8-Ba(2)-O(2)#6 | 156.4(3)  |

|                     |          |
|---------------------|----------|
| O(1)#3-Ba(2)-O(3)   | 132.2(3) |
| O(1)-Ba(2)-O(3)     | 74.0(2)  |
| O(2)#8-Ba(2)-O(3)   | 133.4(2) |
| O(2)#6-Ba(2)-O(3)   | 66.9(2)  |
| O(1)#3-Ba(2)-O(3)#2 | 74.0(2)  |
| O(1)-Ba(2)-O(3)#2   | 132.2(3) |
| O(2)#8-Ba(2)-O(3)#2 | 66.9(2)  |
| O(2)#6-Ba(2)-O(3)#2 | 133.4(2) |
| O(3)-Ba(2)-O(3)#2   | 87.97(3) |
| O(1)#3-Ba(2)-O(4)   | 144.3(2) |
| O(1)-Ba(2)-O(4)     | 64.6(2)  |
| O(2)#8-Ba(2)-O(4)   | 85.4(2)  |
| O(2)#6-Ba(2)-O(4)   | 111.4(2) |
| O(3)-Ba(2)-O(4)     | 48.5(2)  |
| O(3)#2-Ba(2)-O(4)   | 70.3(2)  |
| O(1)#3-Ba(2)-O(4)#3 | 64.6(2)  |
| O(1)-Ba(2)-O(4)#3   | 144.3(2) |
| O(2)#8-Ba(2)-O(4)#3 | 111.4(2) |
| O(2)#6-Ba(2)-O(4)#3 | 85.4(2)  |
| O(3)-Ba(2)-O(4)#3   | 70.3(2)  |
| O(3)#2-Ba(2)-O(4)#3 | 48.5(2)  |
| O(4)-Ba(2)-O(4)#3   | 91.9(3)  |
| O(2)-Ba(3)-O(2)#8   | 157.0(3) |
| O(2)-Ba(3)-O(1)#9   | 78.4(2)  |
| O(2)#8-Ba(3)-O(1)#9 | 95.8(2)  |
| O(2)-Ba(3)-O(1)#3   | 95.8(2)  |
| O(2)#8-Ba(3)-O(1)#3 | 78.4(2)  |
| O(1)#9-Ba(3)-O(1)#3 | 150.9(3) |
| O(2)-Ba(3)-O(3)#2   | 132.1(3) |
| O(2)#8-Ba(3)-O(3)#2 | 67.6(2)  |
| O(1)#9-Ba(3)-O(3)#2 | 132.7(2) |
| O(1)#3-Ba(3)-O(3)#2 | 71.7(2)  |
| O(2)-Ba(3)-O(3)#9   | 67.6(2)  |
| O(2)#8-Ba(3)-O(3)#9 | 132.1(3) |

|                       |            |
|-----------------------|------------|
| O(1)#9-Ba(3)-O(3)#9   | 71.7(2)    |
| O(1)#3-Ba(3)-O(3)#9   | 132.7(2)   |
| O(3)#2-Ba(3)-O(3)#9   | 87.16(3)   |
| O(2)-Ba(3)-O(4)#5     | 111.9(2)   |
| O(2)#8-Ba(3)-O(4)#5   | 85.1(2)    |
| O(1)#9-Ba(3)-O(4)#5   | 66.2(2)    |
| O(1)#3-Ba(3)-O(4)#5   | 140.1(2)   |
| O(3)#2-Ba(3)-O(4)#5   | 68.4(2)    |
| O(3)#9-Ba(3)-O(4)#5   | 47.2(2)    |
| O(2)-Ba(3)-O(4)#2     | 85.1(2)    |
| O(2)#8-Ba(3)-O(4)#2   | 111.9(2)   |
| O(1)#9-Ba(3)-O(4)#2   | 140.1(2)   |
| O(1)#3-Ba(3)-O(4)#2   | 66.2(2)    |
| O(3)#2-Ba(3)-O(4)#2   | 47.2(2)    |
| O(3)#9-Ba(3)-O(4)#2   | 68.4(2)    |
| O(4)#5-Ba(3)-O(4)#2   | 87.4(3)    |
| O(2)-Ba(3)-O(5)#10    | 74.3(2)    |
| O(2)#8-Ba(3)-O(5)#10  | 86.1(2)    |
| O(1)#9-Ba(3)-O(5)#10  | 105.6(2)   |
| O(1)#3-Ba(3)-O(5)#10  | 46.0(2)    |
| O(3)#2-Ba(3)-O(5)#10  | 116.37(18) |
| O(3)#9-Ba(3)-O(5)#10  | 141.6(2)   |
| O(4)#5-Ba(3)-O(5)#10  | 167.2(2)   |
| O(4)#2-Ba(3)-O(5)#10  | 104.5(2)   |
| O(2)-Ba(3)-O(5)#11    | 86.1(2)    |
| O(2)#8-Ba(3)-O(5)#11  | 74.3(2)    |
| O(1)#9-Ba(3)-O(5)#11  | 46.0(2)    |
| O(1)#3-Ba(3)-O(5)#11  | 105.6(2)   |
| O(3)#2-Ba(3)-O(5)#11  | 141.6(2)   |
| O(3)#9-Ba(3)-O(5)#11  | 116.37(18) |
| O(4)#5-Ba(3)-O(5)#11  | 104.5(2)   |
| O(4)#2-Ba(3)-O(5)#11  | 167.2(2)   |
| O(5)#10-Ba(3)-O(5)#11 | 64.1(3)    |
| O(4)#12-B(1)-O(4)     | 122.4(14)  |

|                     |           |
|---------------------|-----------|
| O(4)#12-B(1)-O(3)   | 118.8(7)  |
| O(4)-B(1)-O(3)      | 118.8(7)  |
| O(2)#8-B(2)-O(5)    | 120.0(11) |
| O(2)#8-B(2)-O(1)#11 | 121.6(11) |
| O(5)-B(2)-O(1)#11   | 118.4(11) |

---

Symmetry transformations used to generate equivalent atoms:

- #1  $-x+3/2, -y+3/2, z+1/2$     #2  $-x+1, -y+2, z-1/2$   
#3  $-x+1, y, -z+3/2$     #4  $-x+1, -y+2, z+1/2$   
#5  $x, -y+2, -z+1$     #6  $x, y, z+1$     #7  $x-1, y, z$   
#8  $-x+1, y, -z+1/2$     #9  $x, y, z-1$     #10  $x-1/2, -y+3/2, -z+1$   
#11  $-x+3/2, -y+3/2, z-1/2$     #12  $x, -y+2, -z+2$   
#13  $-x+2, y, -z+5/2$     #14  $x+1, y, z$

Figure S1. The IR spectrum of  $\text{Pb}_2\text{Ba}_3(\text{BO}_3)_3\text{Br}$ .

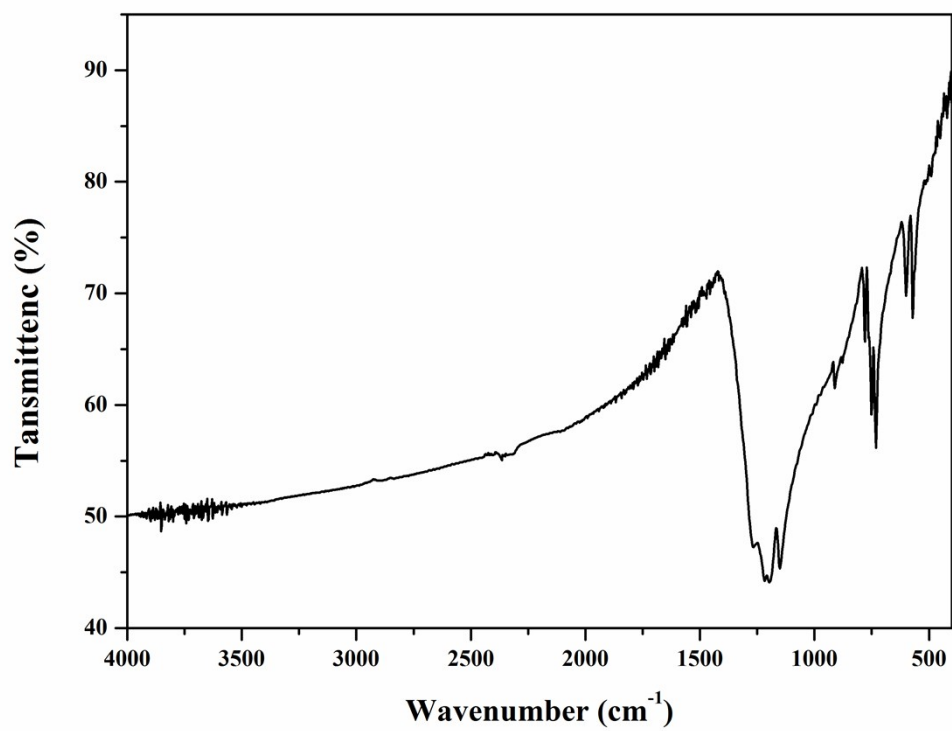

Supplement: c5dt02652k2.pdf [file c5dt02652k2.pdf]
